# Supplementary material for: Amphibian skin-associated Pigmentiphaga: Genome sequence and occurrence across geography and hosts
Source: PLOS journal article supplement (doi:10.1371/journal.pone.0223747), 2019-10-11

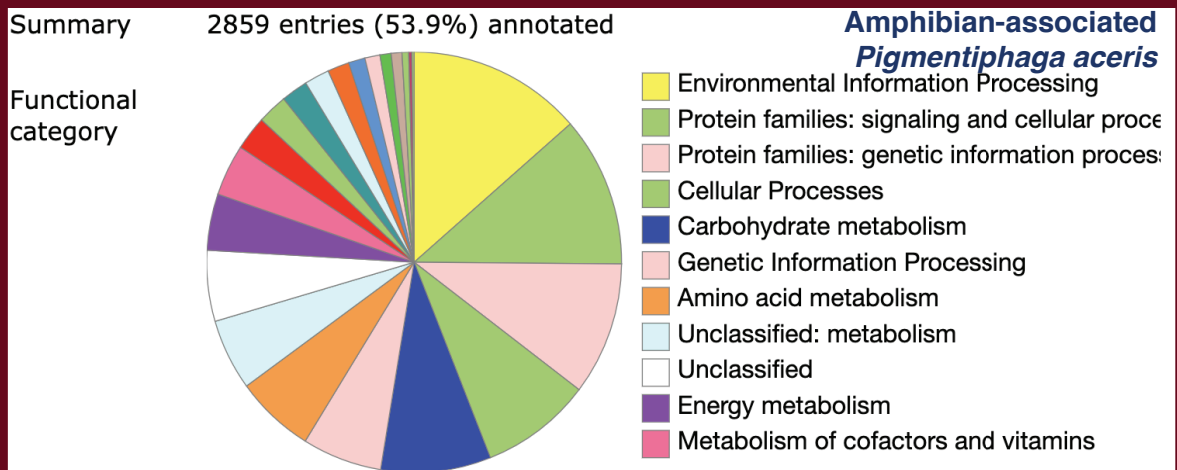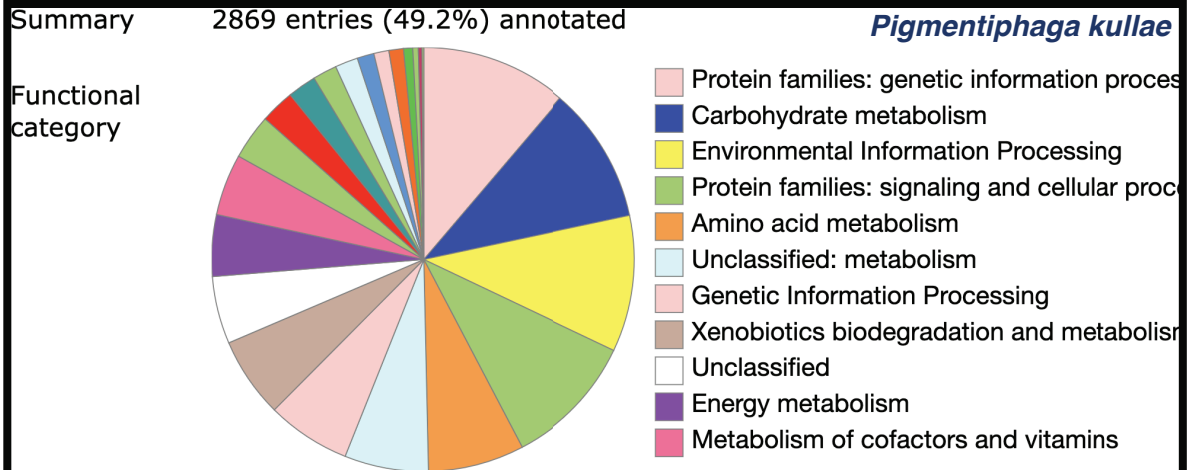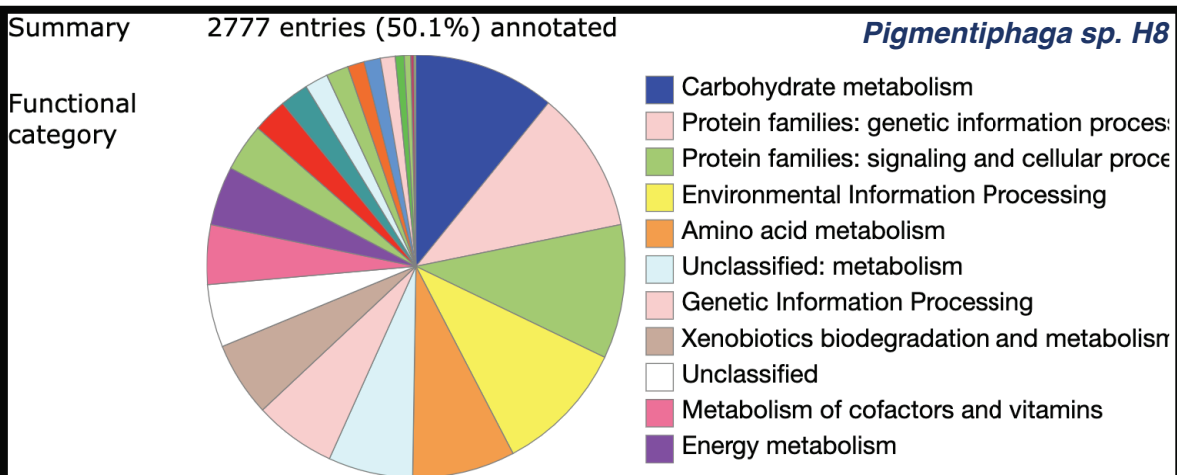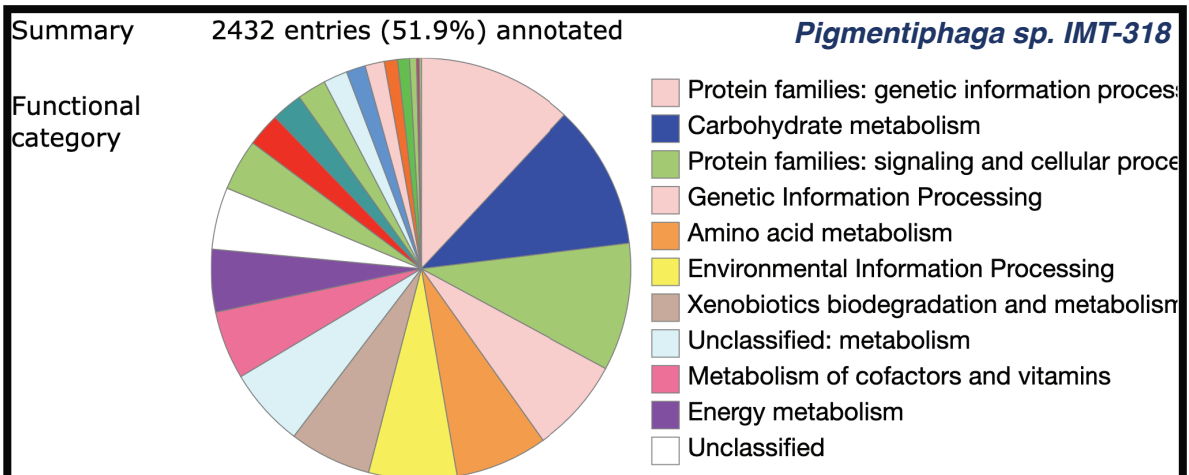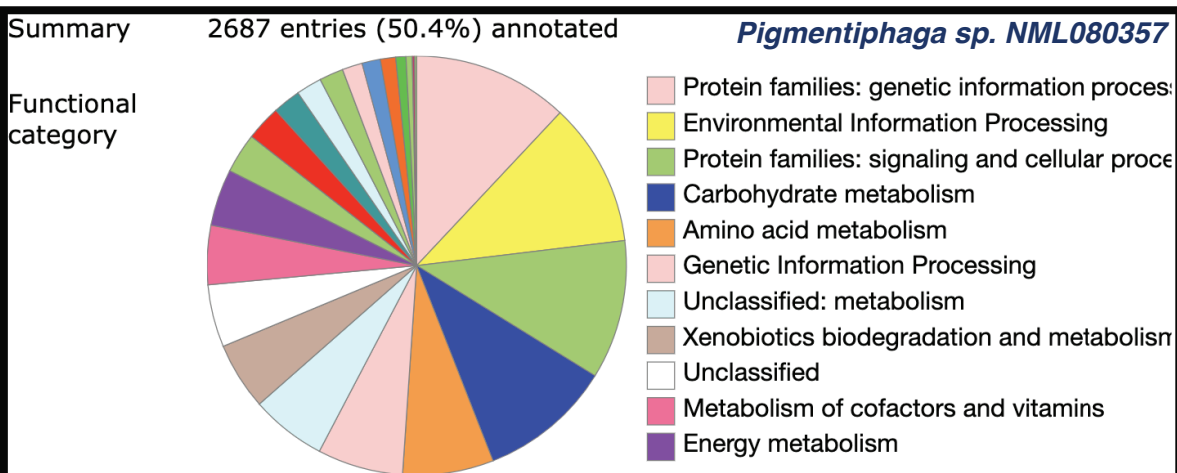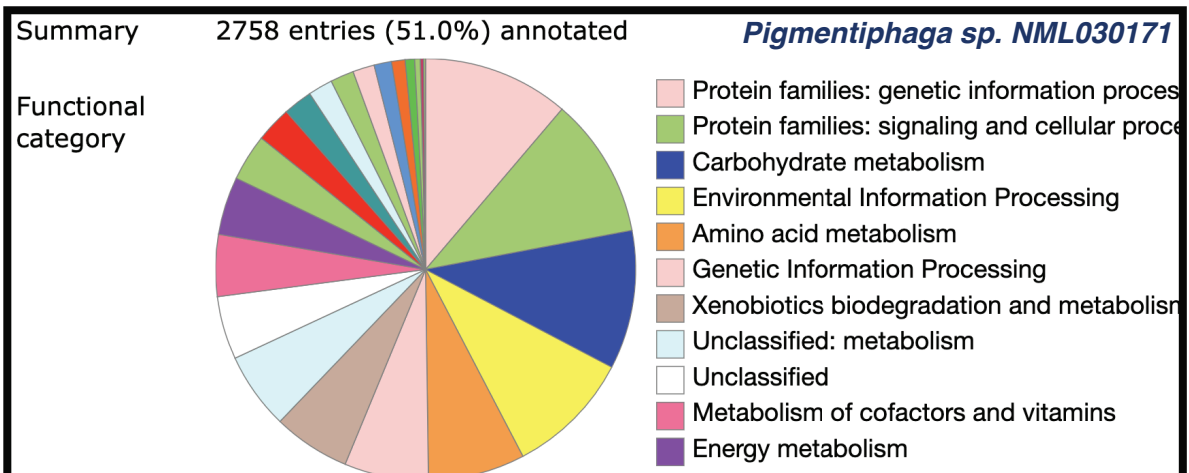

Supplement: S2 (10.1371/journal.pone.0223747.s002) [file journal.pone.0223747.s002]
